# Supplementary material for: Modulating Expression Levels of TCP Transcription Factors by Mentha x piperita Volatiles—An Allelopathic Tool to Influence Leaf Growth?
Source: MDPI journal article supplement (doi:10.3390/plants11223078), 2022-11-14
Supplement: s1 [file s1]

## Supplementary File to

### Modulating Expression Levels of TCP Transcription Factors by *Mentha x piperita* Volatiles – An Allelopathic Tool to Influence Leaf Growth?

Matthias Preusche<sup>1,2</sup>, Marvin Vahl<sup>1</sup>, Johanna Riediger<sup>1,2</sup>, Andreas Ulbrich<sup>1</sup> and Margot Schulz<sup>2</sup>

<sup>1</sup> Affiliation 1 Department of Horticultural Production, University of Applied Science, Osnabrück, Germany; m.preusche@hs-osnabrueck.de; a.ulbrich@hs-osnabrueck.de; m.vahl@hs-osnabrueck.de

<sup>2</sup> Affiliation 2 Institute of Molecular Physiology and Biotechnology of Plants (IMBIO), University of Bonn; ulp509@uni-bonn.de

\*Correspondence: ulp509@uni-bonn.de

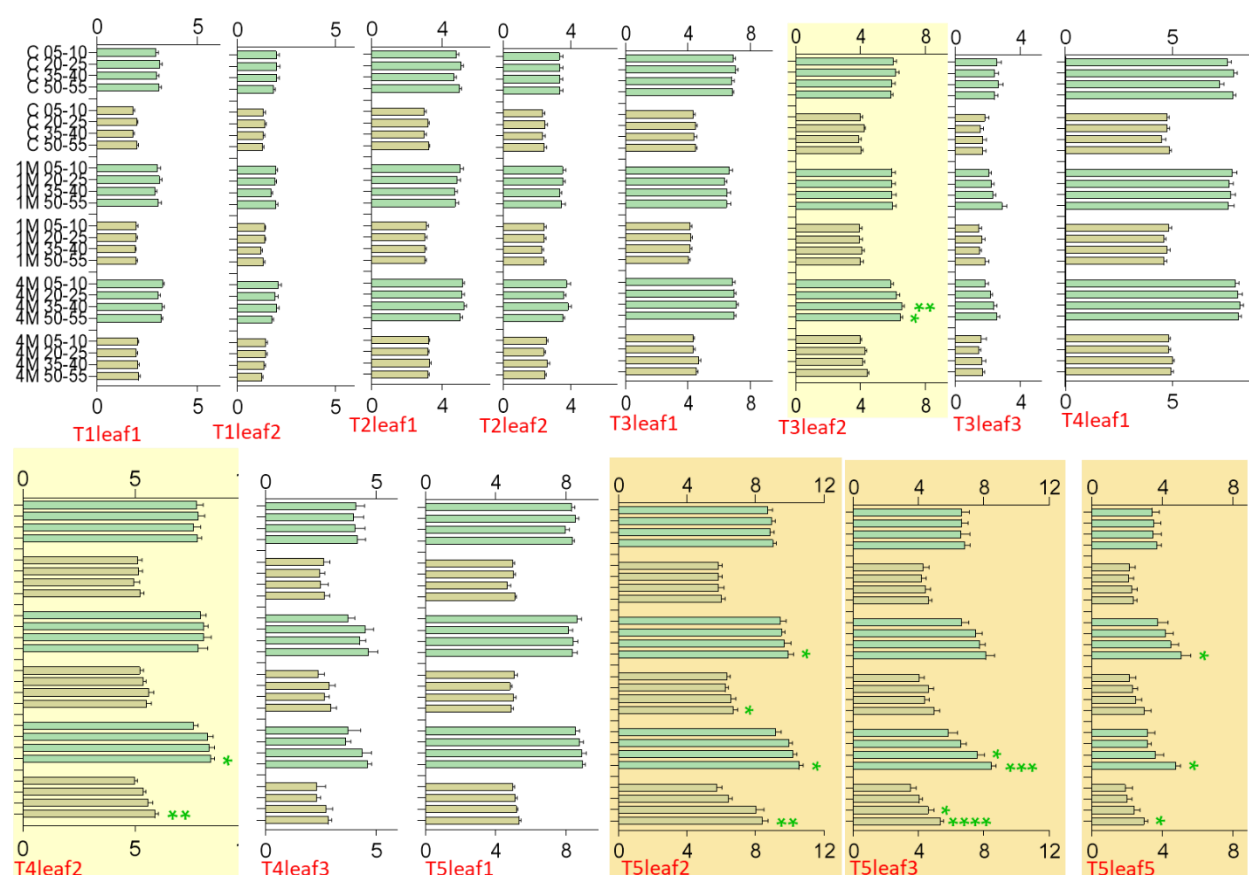

**Figure S1.** Greenhouse trial. White cabbage leaf length (green) and width growth (olive) of the control (C) in presence of 1 (1M) or 4 *Mentha* plants (4M) at the distances 05-10, 20-25, 35-40 and 50-55 cm. Growth parameters are shown for single leaves. T1: leaf 1 and leaf 2; T2: leaf 1 and leaf 2; T3: leaf 1, 2, and 3; T4: leaf 1, 2, and 3; T5: leaf 1, 2, 3, and 4. Colored backgrounds mark leaves with the highest responsiveness to the treatment. At T1, no response to *Mentha* volatiles was found. The highest response was developed at the latest phase of the fumigation. Green asterisks indicate increase, significance levels: (t-test): \* $p < 0.05$ ; \*\* $p < 0.005$ ; \*\*\* $p < 0.0005$ ; bars without asterisk: no significance.

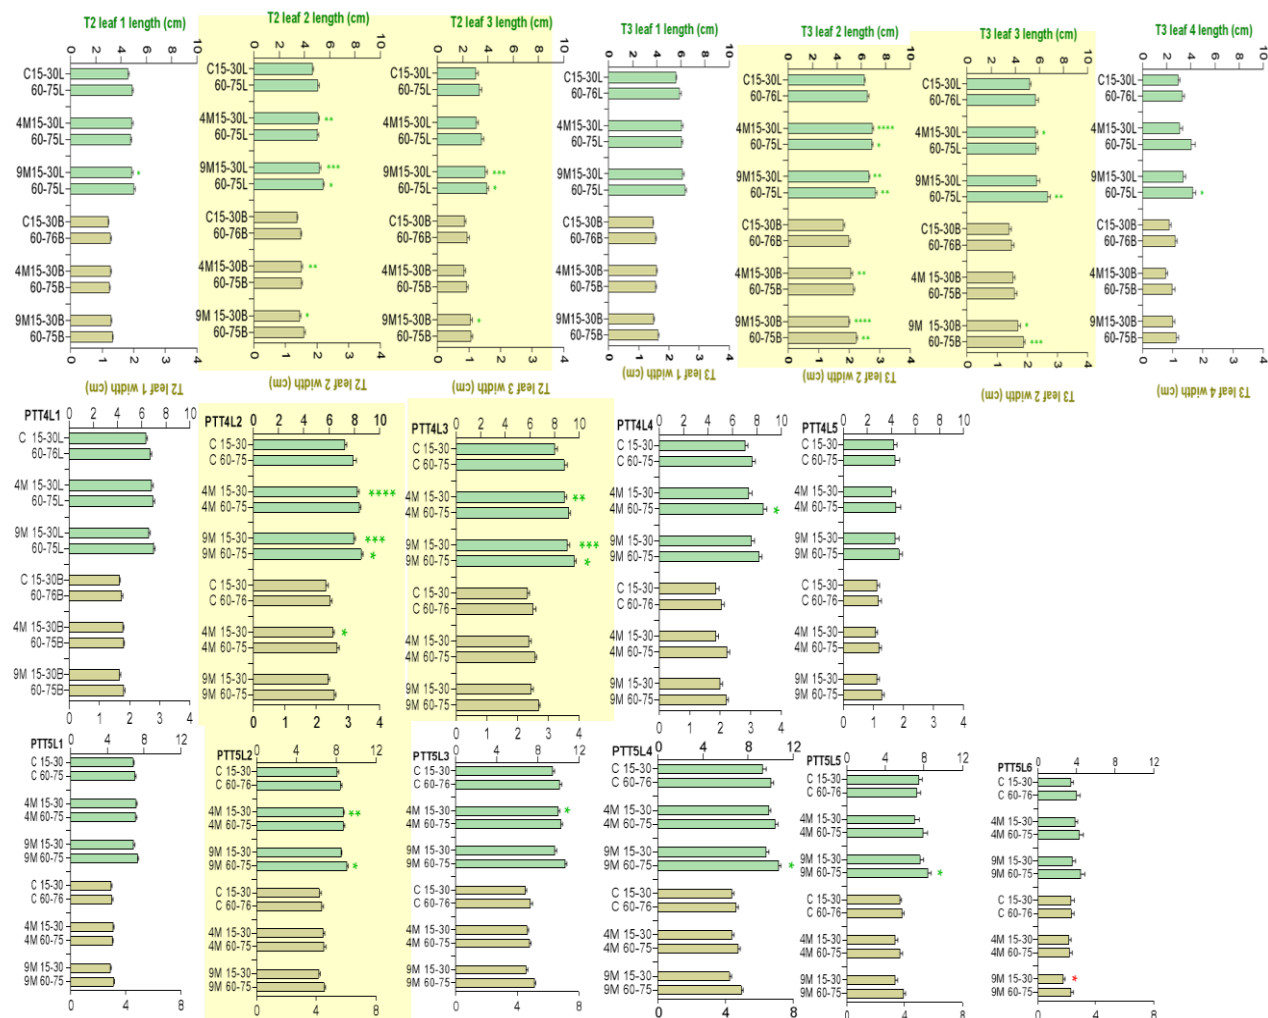

**Figure S2.** Poly tunnel Trial: White cabbage leaf length (green) and width growth (olive) of the control (C) in presence of 4 (4M) or 9 *Mentha* plants (9M) at the distances 15-30 and 55-75 cm. Growth parameters are shown for single leaves. T2: leaf 1, 2 and 3; T3: leaf 1, 2, 3, and 4; T4: leaf 1, 2, 3, 4 and 5, T5: leaf 1, 2, 3, 4, 5 and 6. Light yellow backgrounds mark leaves with the highest responsiveness to the treatment. Green asterisks indicate increase, red asterisk significant lower growth compared to the controls, significance levels: (t-test): \* $p < 0.05$ ; \*\* $p < 0.005$ ; \*\*\* $p < 0.0005$ ; bars without asterisk: no significance.

**Table S1. Primer Used for Real Time PCR. F: forward Primer; R: reverse Primer**  
Compare [19, 41] references main text.

| <i>Arabidopsis thaliana</i> |                                    |
|-----------------------------|------------------------------------|
| ACT2-F                      | CAT CAT CAT CCT CAT CAT CAG CAT CA |
| ACT2-R                      | AGA TTG AAT GCT CCG CCG TTG GA     |
| LOX2-F                      | GAT GCC CCA GTT CTC ATT AAC AGG G  |
| LOX2-R                      | CGG GTC TAG TTT GCT TAT TAA CGG C  |
| TCP2-F                      | CAT CAT CAT CCT CAT CAT CAG CAT CA |
| TCP2-R                      | AGA TTG AAT GCT CCG CCG TTG GA     |

|                      |                                    |
|----------------------|------------------------------------|
| TCP3-F               | ACC TAT GAT TCG TGC TTG GTT TGA T  |
| TCP3-R               | GAG GGA TAT GGT AGG GAT GAT GAT G  |
| TCP4-F               | TTC GGA AGG ATT CAG AGA CTA GTG G  |
| TCP4-R               | AGG AGT AGG AGG AGC GAA CAG AAA C  |
| TCP9-F               | TGC CGT CGT TTT CAA TGT CTT TAG C  |
| TCP9-R               | TTC TCC CTC TTC CTT CAA CCT TCG    |
| TCP10-F              | AAG CTT CTT CGA TGT TTG CTT CAT C  |
| TCP10-R              | GCT TCT TCT CCG TGG AGT AGT CTT G  |
| TCP20-F              | TTA GGC TTG TCT CAA GAA GGG AAT G  |
| TCP20-R              | GCA TAT GGT GAA GAA CCC TAC CTT G  |
| TCP24-F              | CCT TCA GTC CAA TTC ACA ATC TCT CT |
| TCP24-R              | GCT TTG ACT ATC CAT TGG AGA AGA G  |
| ACT2-F               | CTTGACCAAGCAGCATGAA                |
| ACT2-R               | CCGATCCAGACACTGTACTTCCTT           |
| <i>Brassica rapa</i> |                                    |
| BrTCP2aF             | GTGCTCACCCCTTTCTCCGAC              |
| BrTCP2aR             | ATCCTGCCGGAGAAATCAGA               |
| BrTCP2bF             | TCCGATGAACGATGACGACA               |
| BrTCP2bR             | GACAACGAGTTAGCCGCAGC               |
| BrTCP3F              | GCGAGATCGTGGAGGTTGAA               |
| BrTCP3R              | TGGCCGTACAGACTTTGCTG               |
| BrTCP4aF             | GTTCTACGGGCAGAGCAATCC              |
| BrTCP4aR             | GCCACCAGCCTCTGAATTGA               |
| BrTCP4bF             | TTCTTCTTCAATGAGACGCCG              |
| BrTCP4bR             | TGACCTCCTTGCACCTCGAC               |
| BrTCP4cF             | GACTGGTGGCTTGTAACGGC               |
| BrTCP4cR             | TCGTCCGAGAAGGAGCAAAG               |
| BrTCP9aF             | CGGCCATCGCTATGTCTGTT               |
| BrTCP9aR             | CCGAGTTATCTCCCACGTCAG              |
| BrTCP9bF             | CTCCACCGTCGTCGTCATA                |
| BrTCP9bR             | TTCTCTTCCTTCGACCTTGG               |
| BrTCP10F             | GTTATAGCGCCGGAGATGGA               |
| BrTCP10R             | GGTCTTTTCGTCCTGTGGCTC              |
| BrTCP20aF            | TTTTGCGTCCATTCTTGGTG               |
| BrTCP20aR            | CCAACATTCCCTTCCTGAGC               |
| BrTCP20bF            | GTAAGAAGCAGCTTGCCCCC               |
| BrTCP20bR            | TCCTGATTCTCCGACCGC                 |
| BrTCP24aF            | CAAGACCGTCTTGGCTTCGA               |
| BrTCP24aR            | CAACTCGGAGATGGAGTCGG               |
| BrTCP24bF            | GCGGCTTCTGACTCAATCTCC              |
| BrTCP24bR            | CGTGCTCGACTTAGACAGCG               |
| BrActin3F            | GTACAACCGGCATCGTGCTT               |
| BrActin3R            | CATGTGGAAGTGCATAACCCTC             |
